# Supplementary material for: Supramolecular helical nanofibers formed by an achiral monopyrrolotetrathiafulvalene derivative: water-triggered gelation and chiral evolution
Source: Royal Society of Chemistry journal article supplement (doi:10.1039/c7nj02215h), 2017-01-01

## Supporting Information

### **Supramolecular Helical Nanofibers Formed by Achiral Monopyrrolotetrathiafulvalene Derivative: Water-Triggered Gelation and Chiral Evolution**

Yucun Liu,<sup>ab</sup> Yu Jia,<sup>ab</sup> Enwei Zhu,<sup>ab</sup> Lihui Liu,<sup>ab</sup> Yu Qiao,<sup>ab</sup> Guangbo Che,<sup>\*ab</sup> and Bingzhu Yin<sup>\*c</sup>

<sup>a</sup> Key Laboratory of Preparation and Application of Environmental Friendly Materials (Jilin Normal University), Ministry of Education, Changchun, 130103, China. E-mail: [guangboche@jlnu.edu.cn](mailto:guangboche@jlnu.edu.cn).

<sup>b</sup> College of Chemistry, Jilin Normal University, Siping, 136000, China.

<sup>c</sup> Key Laboratory of Natural Resources of Changbai Mountain & Functional Molecules, Yanbian University, Ministry of Education, Yanji, China. E-mail: [zqcong@ybu.edu.cn](mailto:zqcong@ybu.edu.cn).

## 1. Additional data

**Table S1** Gelation properties of the compound in various solvents.

| Solvent            | Phase | Solvent              | Phase |
|--------------------|-------|----------------------|-------|
| Benzene            | S     | Dichloromethane      | S     |
| Toluene            | S     | Chloroform           | S     |
| <i>n</i> -Hexane   | IS    | Tetrachloromethane   | S     |
| Cyclohexane        | P     | Acetonitrile         | S     |
| Methylcyclohexane  | P     | DMSO                 | S     |
| Methanol           | IS    | THF                  | S     |
| Ethanol            | P     | DMF                  | S     |
| <i>n</i> -Propanol | P     | DMF:H <sub>2</sub> O | OG    |

S = Soluble; IS = Insoluble; P = Precipitation; OG = Opaque gel.

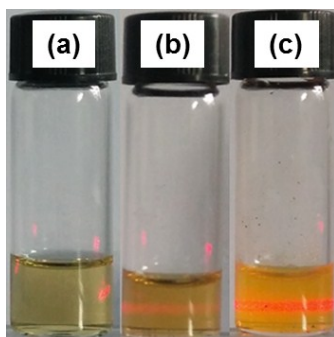

**Figure S1.** The Tyndall phenomena of the compound in different solvents, (a) CHCl<sub>3</sub>, (b) DMF and (c) DMF/water (water ratio was 2.4%). The concentration of the compound was 1 mM.

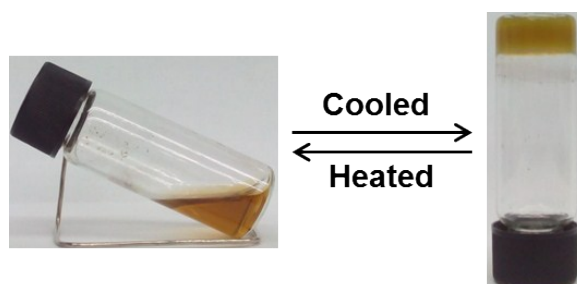

**Figure S2.** Photographs of sol-gel transition of the compound in DMF/water (water ratio was 2.4%).

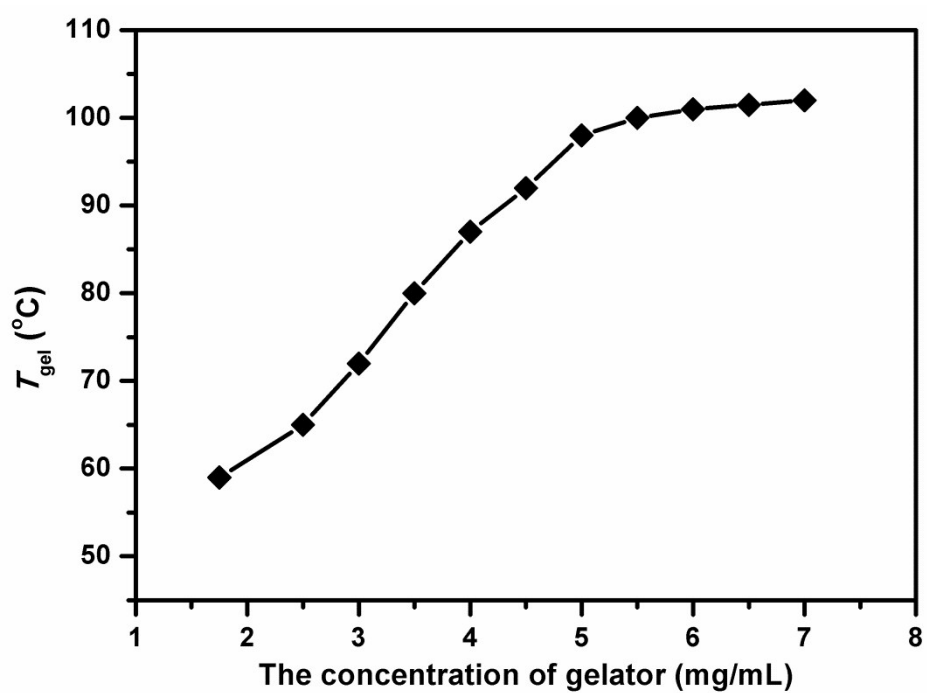

**Figure S3.** Variation of the  $T_{gel}$  of organogel with increasing gelator concentration in DMF/water (water ratio was 7.7%).

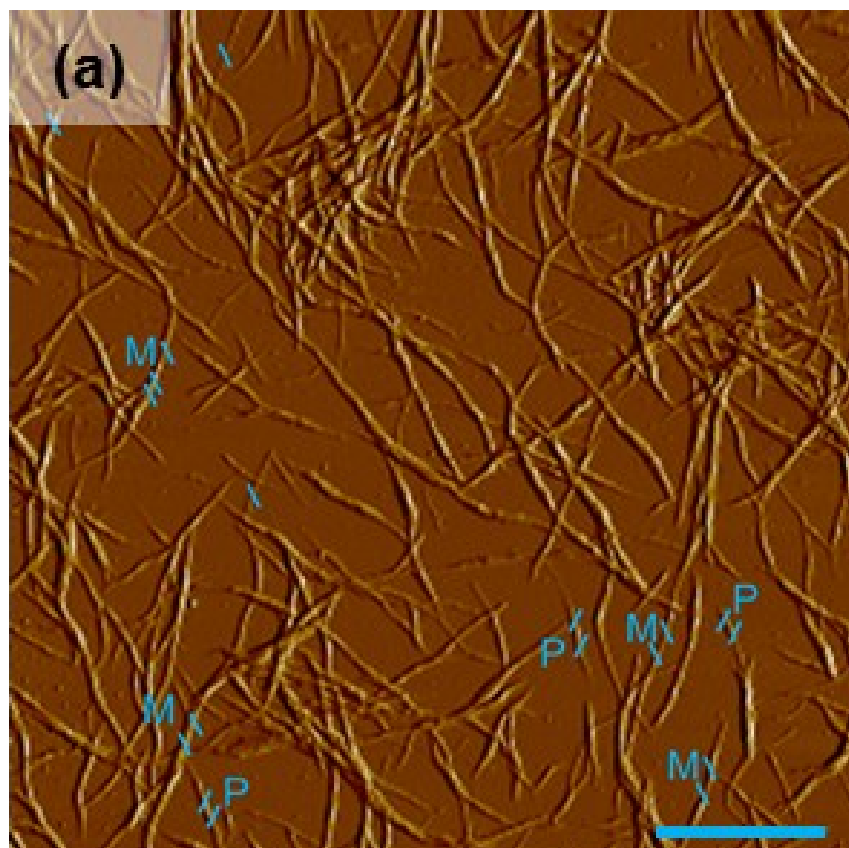

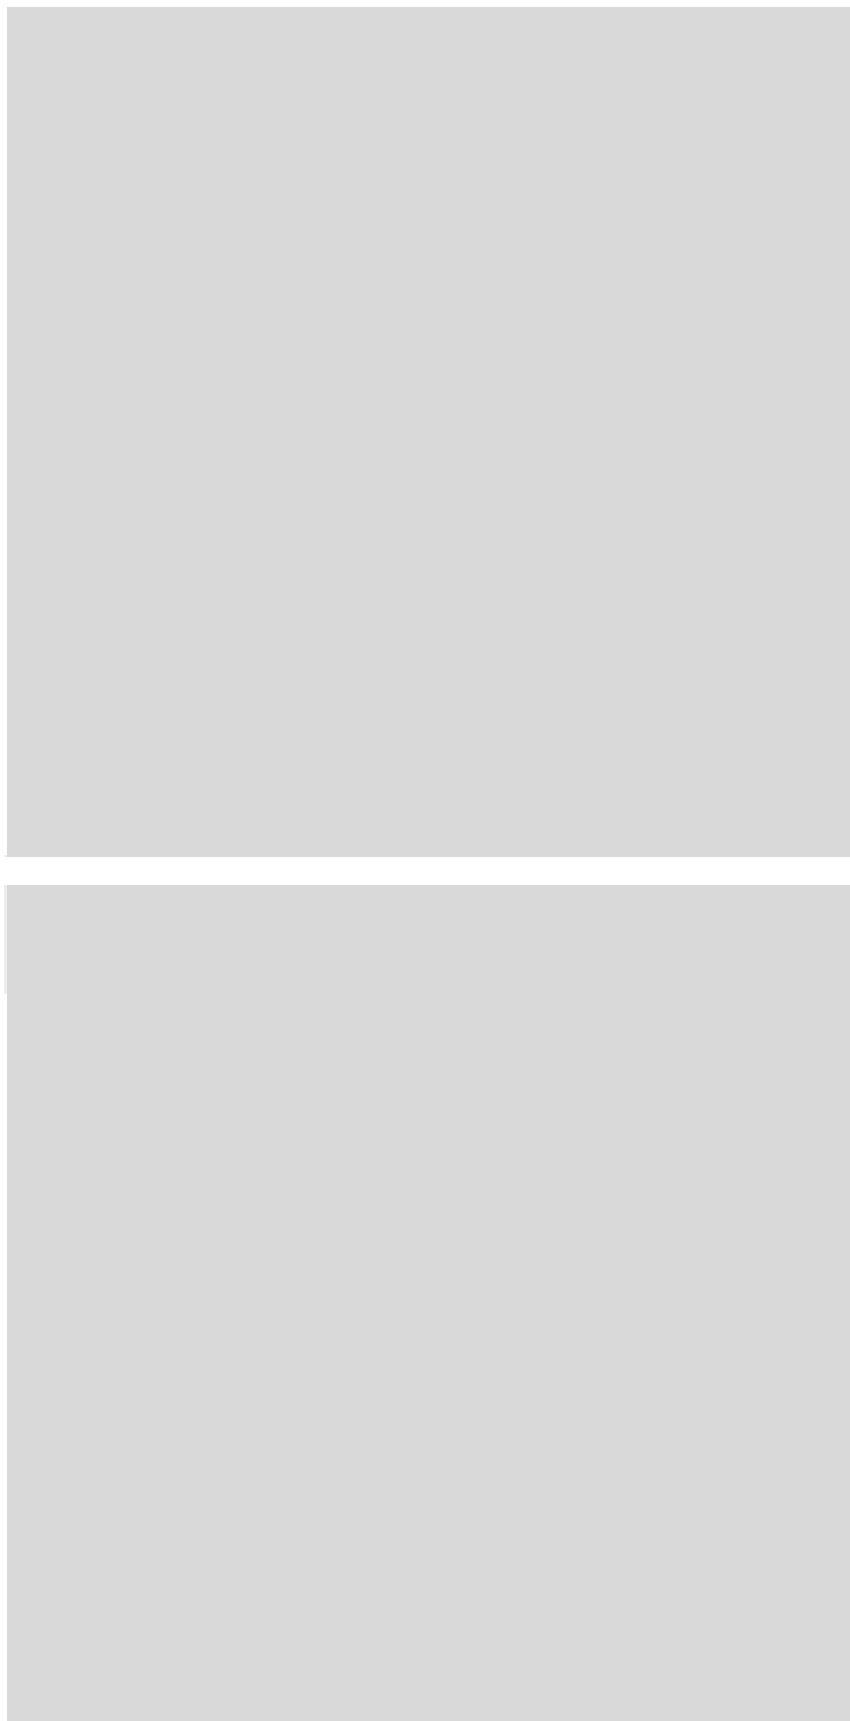

**Figure S4.** AFM images of the self-assembly aggregates of the compound in (a) DMF, (b) DMF/water (water ratio was 2.4%) and (c) DMF/water (water ratio was 7.7%).

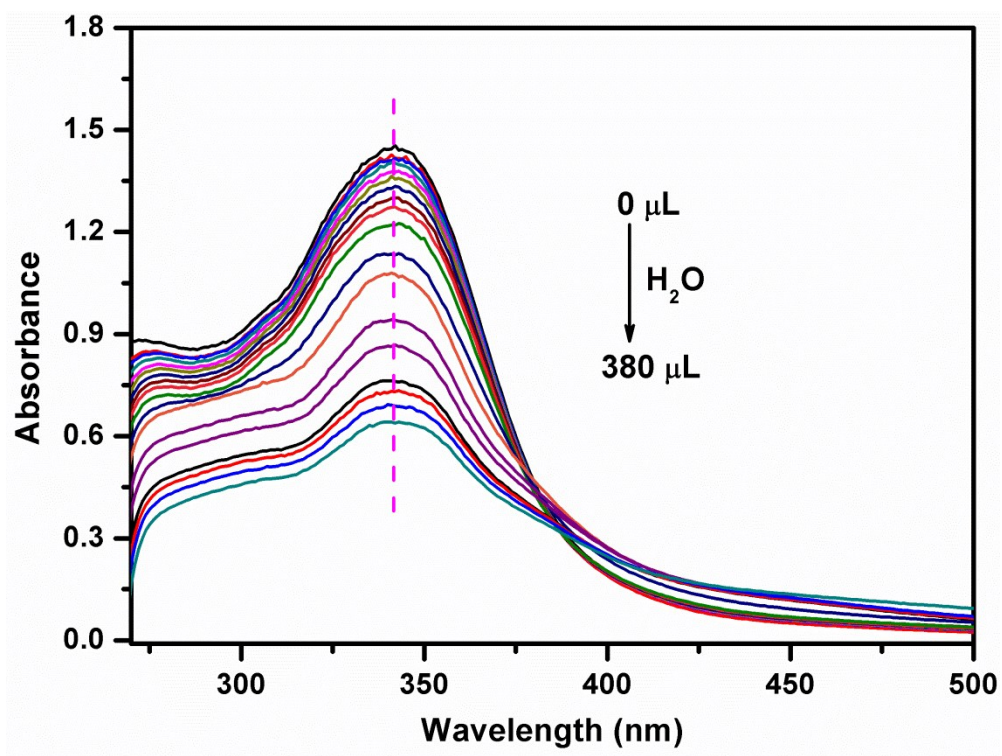

**Figure S5.** UV-Vis spectra of the compound in DMF ( $5 \times 10^{-5}$  M) with increasing the amounts of water at room temperature.

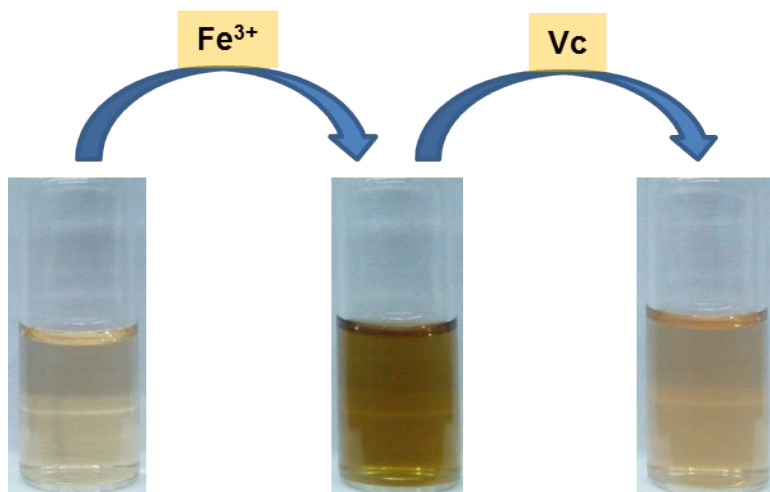

**Figure S6.** The reversible transitions of the color of the compound in CH<sub>3</sub>CN-THF (v:v=1:1) solution induced by chemical redox reaction.

## 2. NMR and MALDI-TOF-MS characterizations

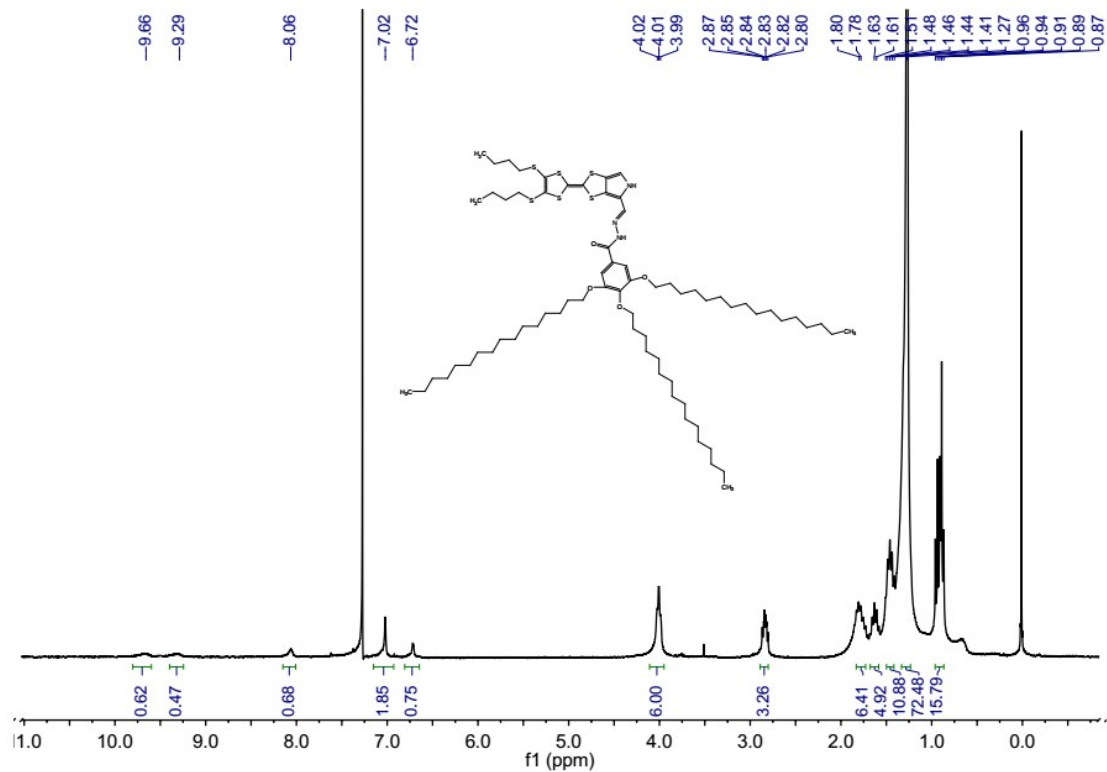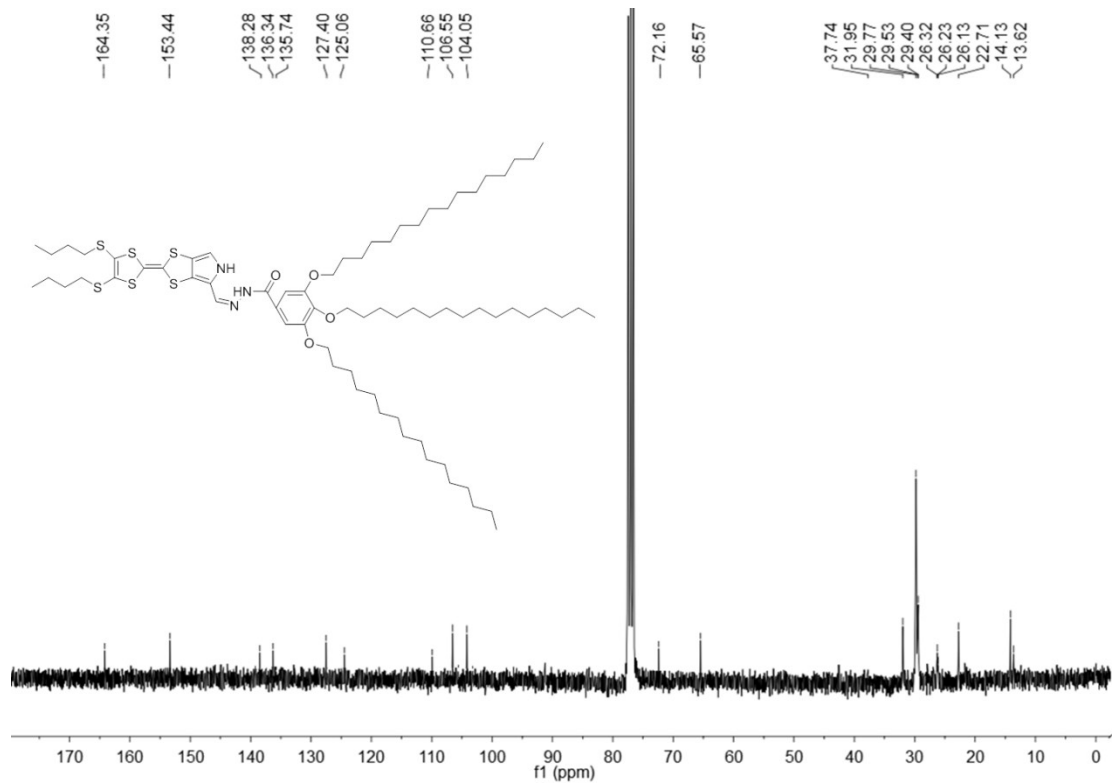

01h

Data: 10001.N2 30 May 2016 15:34 Cal: of 30 May 2016 15:24  
Kratos PC Axima CFRplus V2.4.0: Mode reflectron, Power: 106, P.Ext. @ 1285 (bin 122)

%Int. 5.7 mV[sum= 230 mV] Profiles 73-112 Smooth Av 20 - Baseline 80

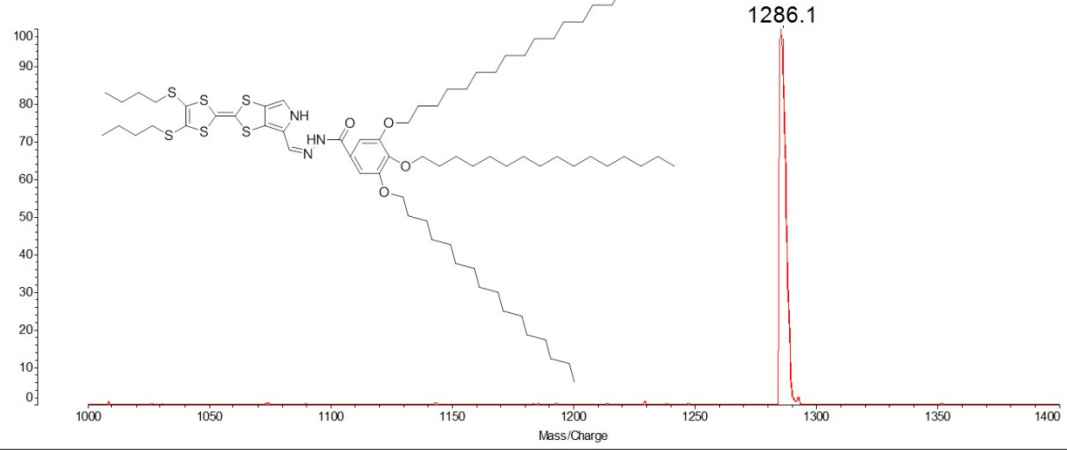

Supplement: c7nj02215h1.pdf [file c7nj02215h1.pdf]
